# Supplementary material
Source: publisher figshare collection journal article supplement (https://sage.figshare.com/ndownloader/files/17291687)
Supplement: Supplementary file 1 [file 17291687]

## Appendix

Table A1 Parameters of equivalent vehicle model

| Parameter                                                                             | Value              | Unit             |
|---------------------------------------------------------------------------------------|--------------------|------------------|
| Mass of car body                                                                      | 35600              | kg               |
| Mass of bogie                                                                         | 2190               | kg               |
| Mass of wheelset                                                                      | 1530               | kg               |
| Roll moment of inertia of car body                                                    | 39500              | kgm <sup>2</sup> |
| Pitch moment of inertia of car body                                                   | $1.07 \times 10^6$ | kgm <sup>2</sup> |
| Yaw moment of inertia of car body                                                     | $1.53 \times 10^6$ | kgm <sup>2</sup> |
| Roll moment of inertia of bogie                                                       | 1460               | kgm <sup>2</sup> |
| Pitch moment of inertia of bogie                                                      | 1460               | kgm <sup>2</sup> |
| Yaw moment of inertia of bogie                                                        | 2740               | kgm <sup>2</sup> |
| Roll moment of inertia of wheelset                                                    | 815                | kgm <sup>2</sup> |
| Yaw moment of inertia of wheelset                                                     | 815                | kgm <sup>2</sup> |
| Total length of car body                                                              | 20                 | m                |
| Half longitudinal distance between bogie centres                                      | 7.1                | m                |
| Half longitudinal distance between axles of two wheelsets                             | 1.3                | m                |
| Half lateral distance between primary springs and dampers                             | 1.0                | m                |
| Half lateral distance between secondary springs and dampers                           | 1.2                | m                |
| Vertical distance from the centre of gravity of each wheelset to that of the car body | 1.19               | m                |
| Vertical distance from the centre of gravity of each wheelset to that of a bogie      | 0.068              | m                |
| Half track gauge                                                                      | 0.75               | m                |
| Nominal rolling radius of wheelset                                                    | 0.42               | m                |
| Stiffness of primary longitudinal spring                                              | 21.5               | MN/m             |

|                                                |                        |                  |
|------------------------------------------------|------------------------|------------------|
| Stiffness of primary lateral spring            | 200                    | MN/m             |
| Stiffness of primary vertical spring           | 3.15                   | MN/m             |
| Stiffness of primary longitudinal damper       | 20                     | kNs/m            |
| Stiffness of primary lateral damper            | 20                     | kNs/m            |
| Stiffness of primary vertical damper           | 5.0                    | kNs/m            |
| Stiffness of secondary longitudinal spring     | 8.0                    | MN/m             |
| Stiffness of secondary lateral spring          | 1.0                    | MN/m             |
| Stiffness of secondary vertical spring         | 0.605                  | MN/m             |
| Damping of secondary longitudinal damper       | 1.3                    | kNs/m            |
| Damping of secondary lateral damper            | 64                     | kNs/m            |
| Damping of secondary vertical damper           | 26                     | kNs/m            |
| Bending stiffness of beam for vertical bending | 3.08                   | MNm <sup>2</sup> |
| Bending stiffness of beam for lateral bending  | 4.95                   | MNm <sup>2</sup> |
| Torsional stiffness of beam                    | 450                    | MNm <sup>2</sup> |
| Mass per unit length                           | 1780                   | kg/m             |
| Torsional inertia                              | 1.93                   | kgm              |
| Damping coefficients for vertical bending*     | 0.001                  |                  |
| Damping coefficients for lateral bending*      | 0.001                  |                  |
| Damping coefficients for torsion*              | 0.0001                 |                  |
| Effective stiffness of rail                    | 99                     | MN/m             |
| Effective damping of rail                      | 200                    | kNs/m            |
| Effective mass of rail                         | 300                    | kg               |
| Coulomb friction coefficient                   | 0.3                    |                  |
| Hertzian contact stiffness                     | 1.30 x 10 <sup>9</sup> | N/m              |

\*Stiffness proportional coefficient of Rayleigh damping
